# Supplementary material
Source: PubMed Central journal article supplement (PMC7269349)
Supplement: ASN.2019090962SupplementaryData1.pdf [file ASN.2019090962SupplementaryData1.pdf]

## Supplemental Table of Contents

|                                                                                         |   |
|-----------------------------------------------------------------------------------------|---|
| Figure S1A. Histological sections from Control and Pax2/8 dKOs.                         | 2 |
| Figure S1B. Higher magnifications of histological sections from Control and Pax2/8 dKOs | 3 |
| Figure S2. Quantitative RT-PCR for selected genes identified by Affymetrix arrays       | 4 |
| Figure S3. Immunostaining of control and Pax2/8 dKOs with antibodies against AQP1 and 2 | 5 |
| Figure S4. Immunostaining of control and Pax2/8 dKOs with antibodies against AQP3 and 4 | 6 |
| Figure S5. Transfection of Pax8 or Pax2 in IMCD cells                                   | 7 |
| Table S1. Excel spreadsheet of gene expression changes identified by Affymetrix arrays  |   |
| Table S2. Relative expression levels of AVP and receptors                               | 8 |
| Table S3. List of PCR primer pairs                                                      | 9 |

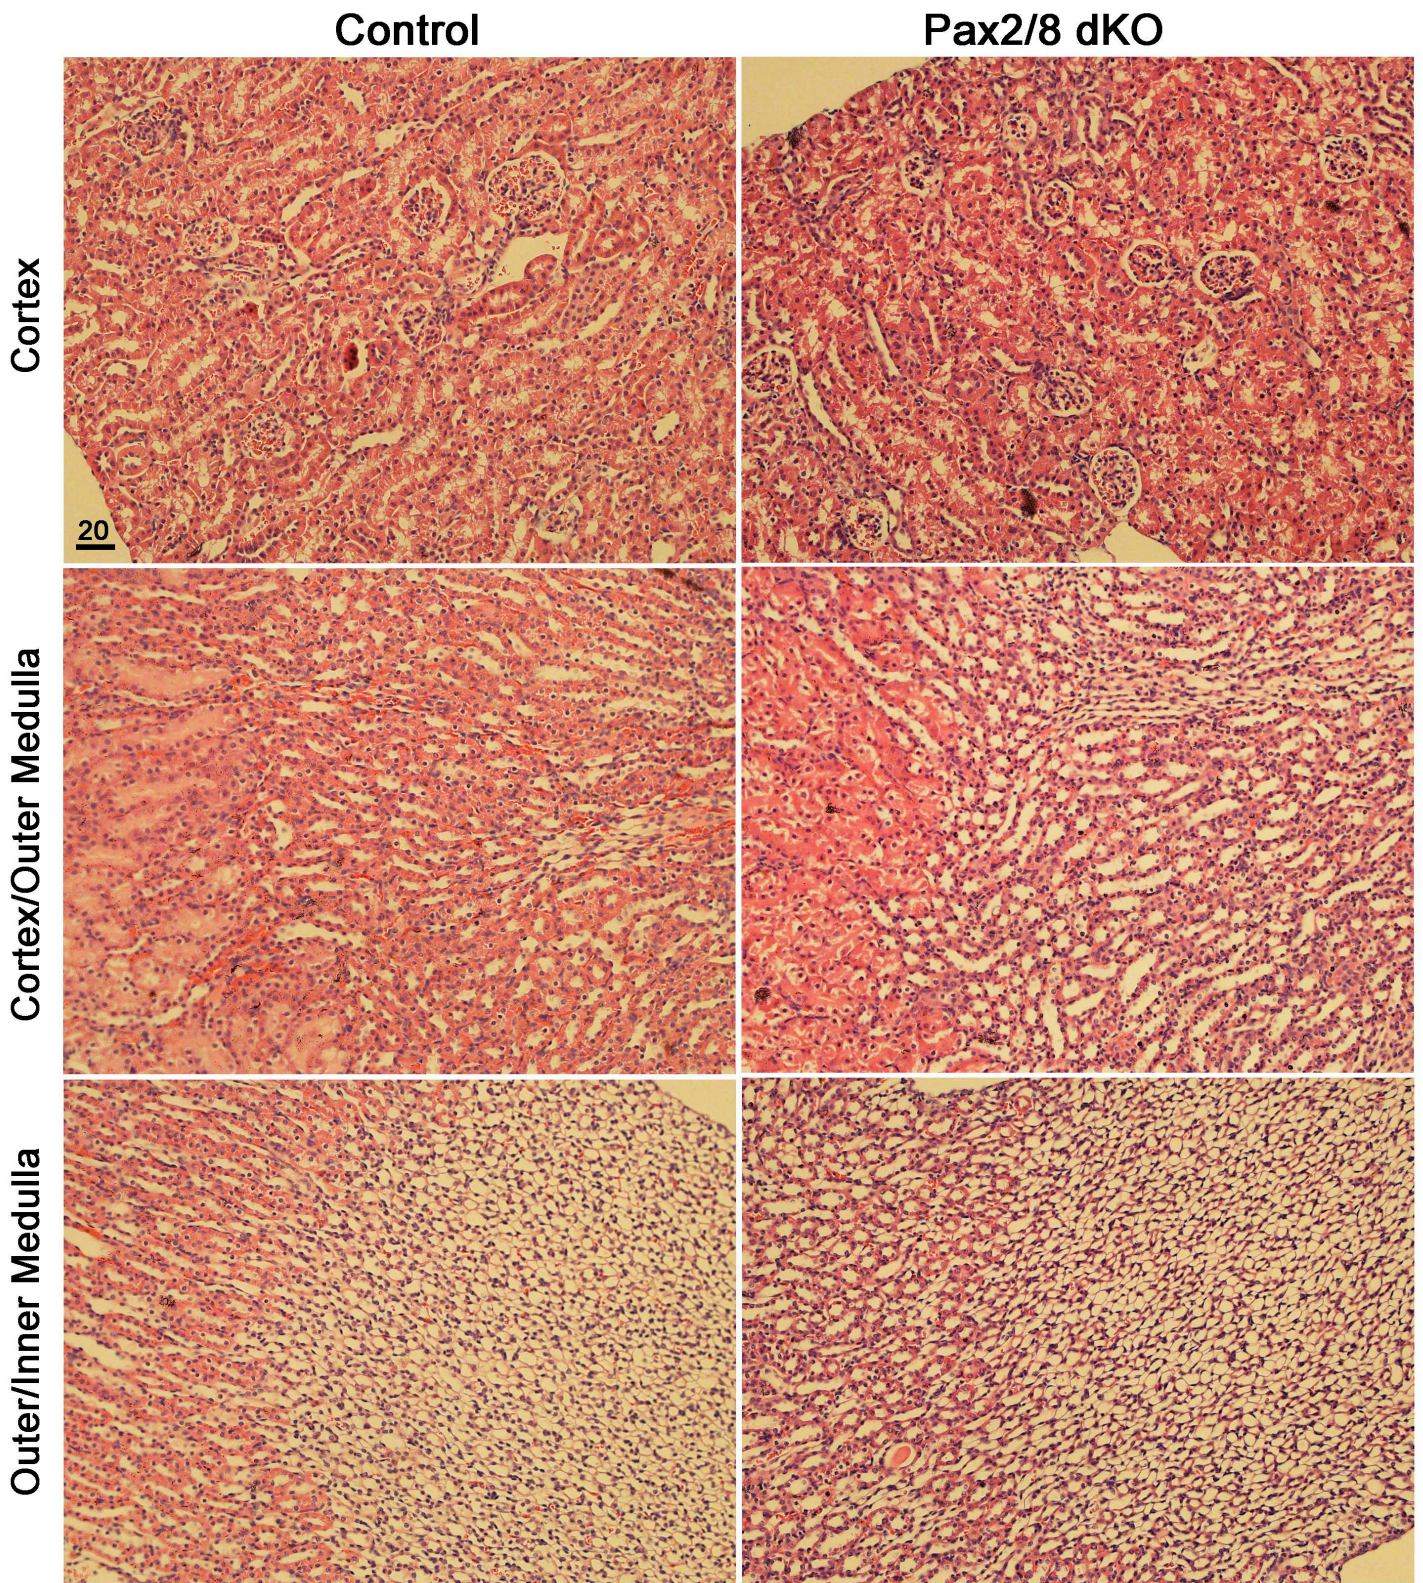

Supplemental Figure S1. A) Histological sections from control and Pax2/8 dKO kidneys taken 2 weeks after last tamoxifen injection. Magnification bar for all panels is 20  $\mu$ m. Staining is by hematoxylin and eosin.

Control

Pax2/8 dKO

Cortex

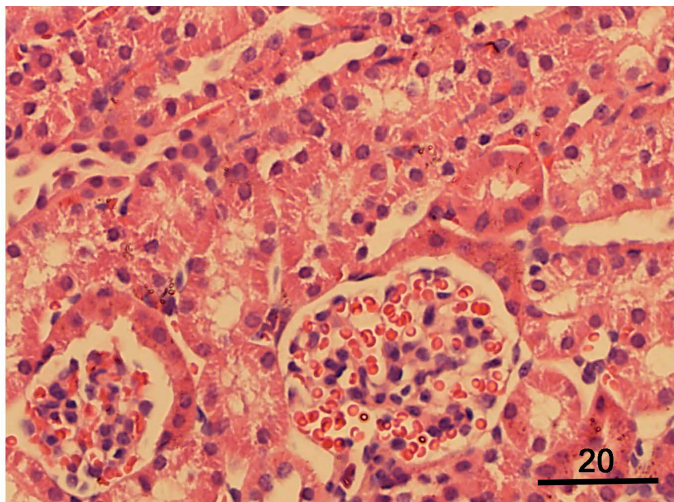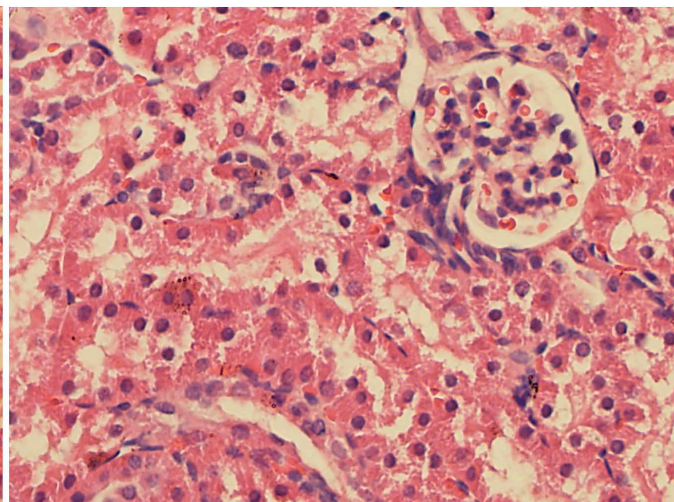

Outer Medulla

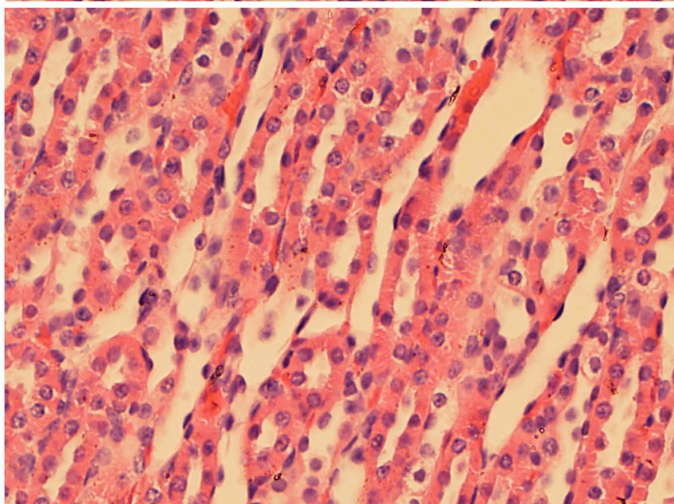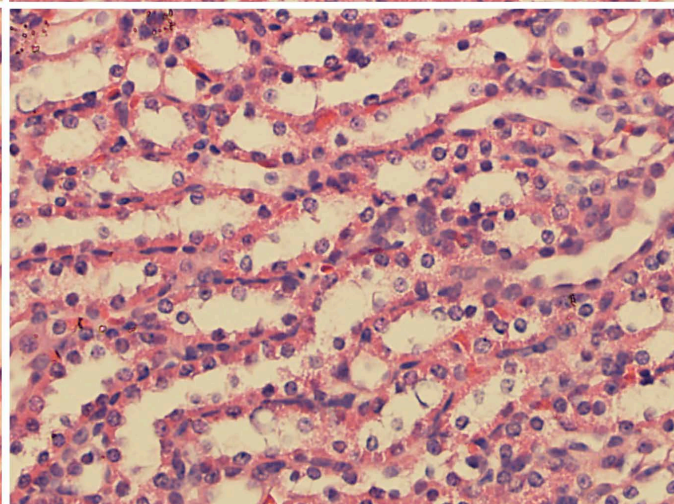

Inner Medulla

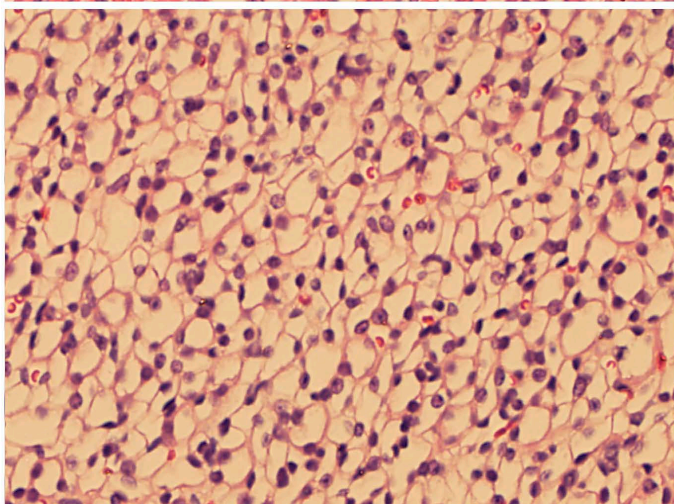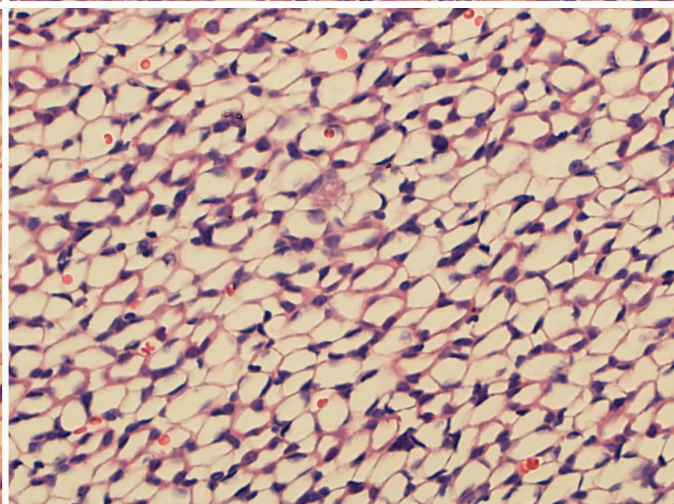

Supplemental Figure S1. B) Higher magnifications of sections from control and Pax2/8 dKO kidneys taken 2 weeks after last tamoxifen injection. Magnification bar for all panels is 20  $\mu\text{m}$ . Staining is by hematoxylin and eosin.

**A**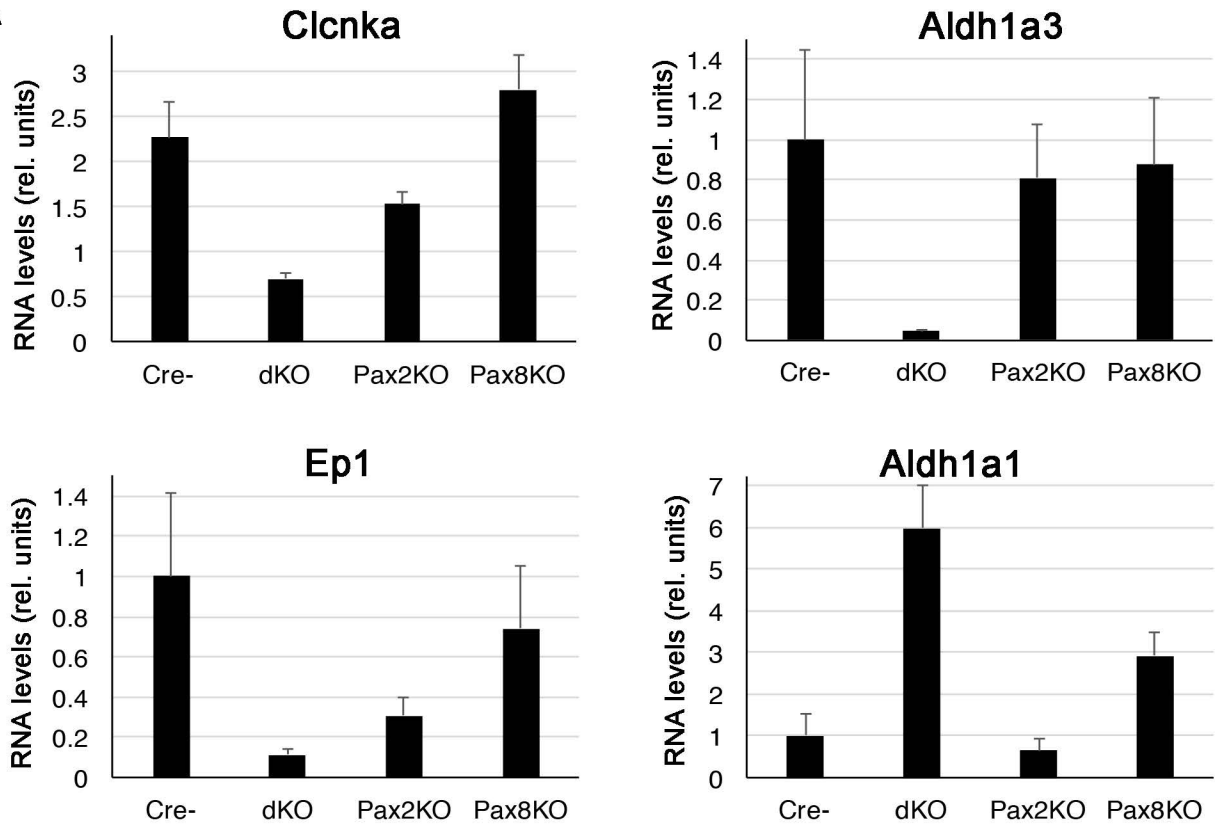**B**

|            | Fold Change in Pax2/8 dKOs |         |      |        |
|------------|----------------------------|---------|------|--------|
|            | Clcnka                     | Aldh1a3 | Ep1  | Aldha1 |
| Affymetrix | -3.4                       | -7.4    | -4.8 | +4.1   |
| qRT-PCR    | -3.7                       | -19.2   | -9.1 | +6.0   |

Supplemental Figure S2. A) Quantitative RT-PCR for selected genes identified by Affymetrix arrays as significantly altered in Pax2/8 dKOs. Controls are Cre- and single and double KOs are shown. B) Comparison of fold change detected by qRT-PCR and Affymetrix arrays.

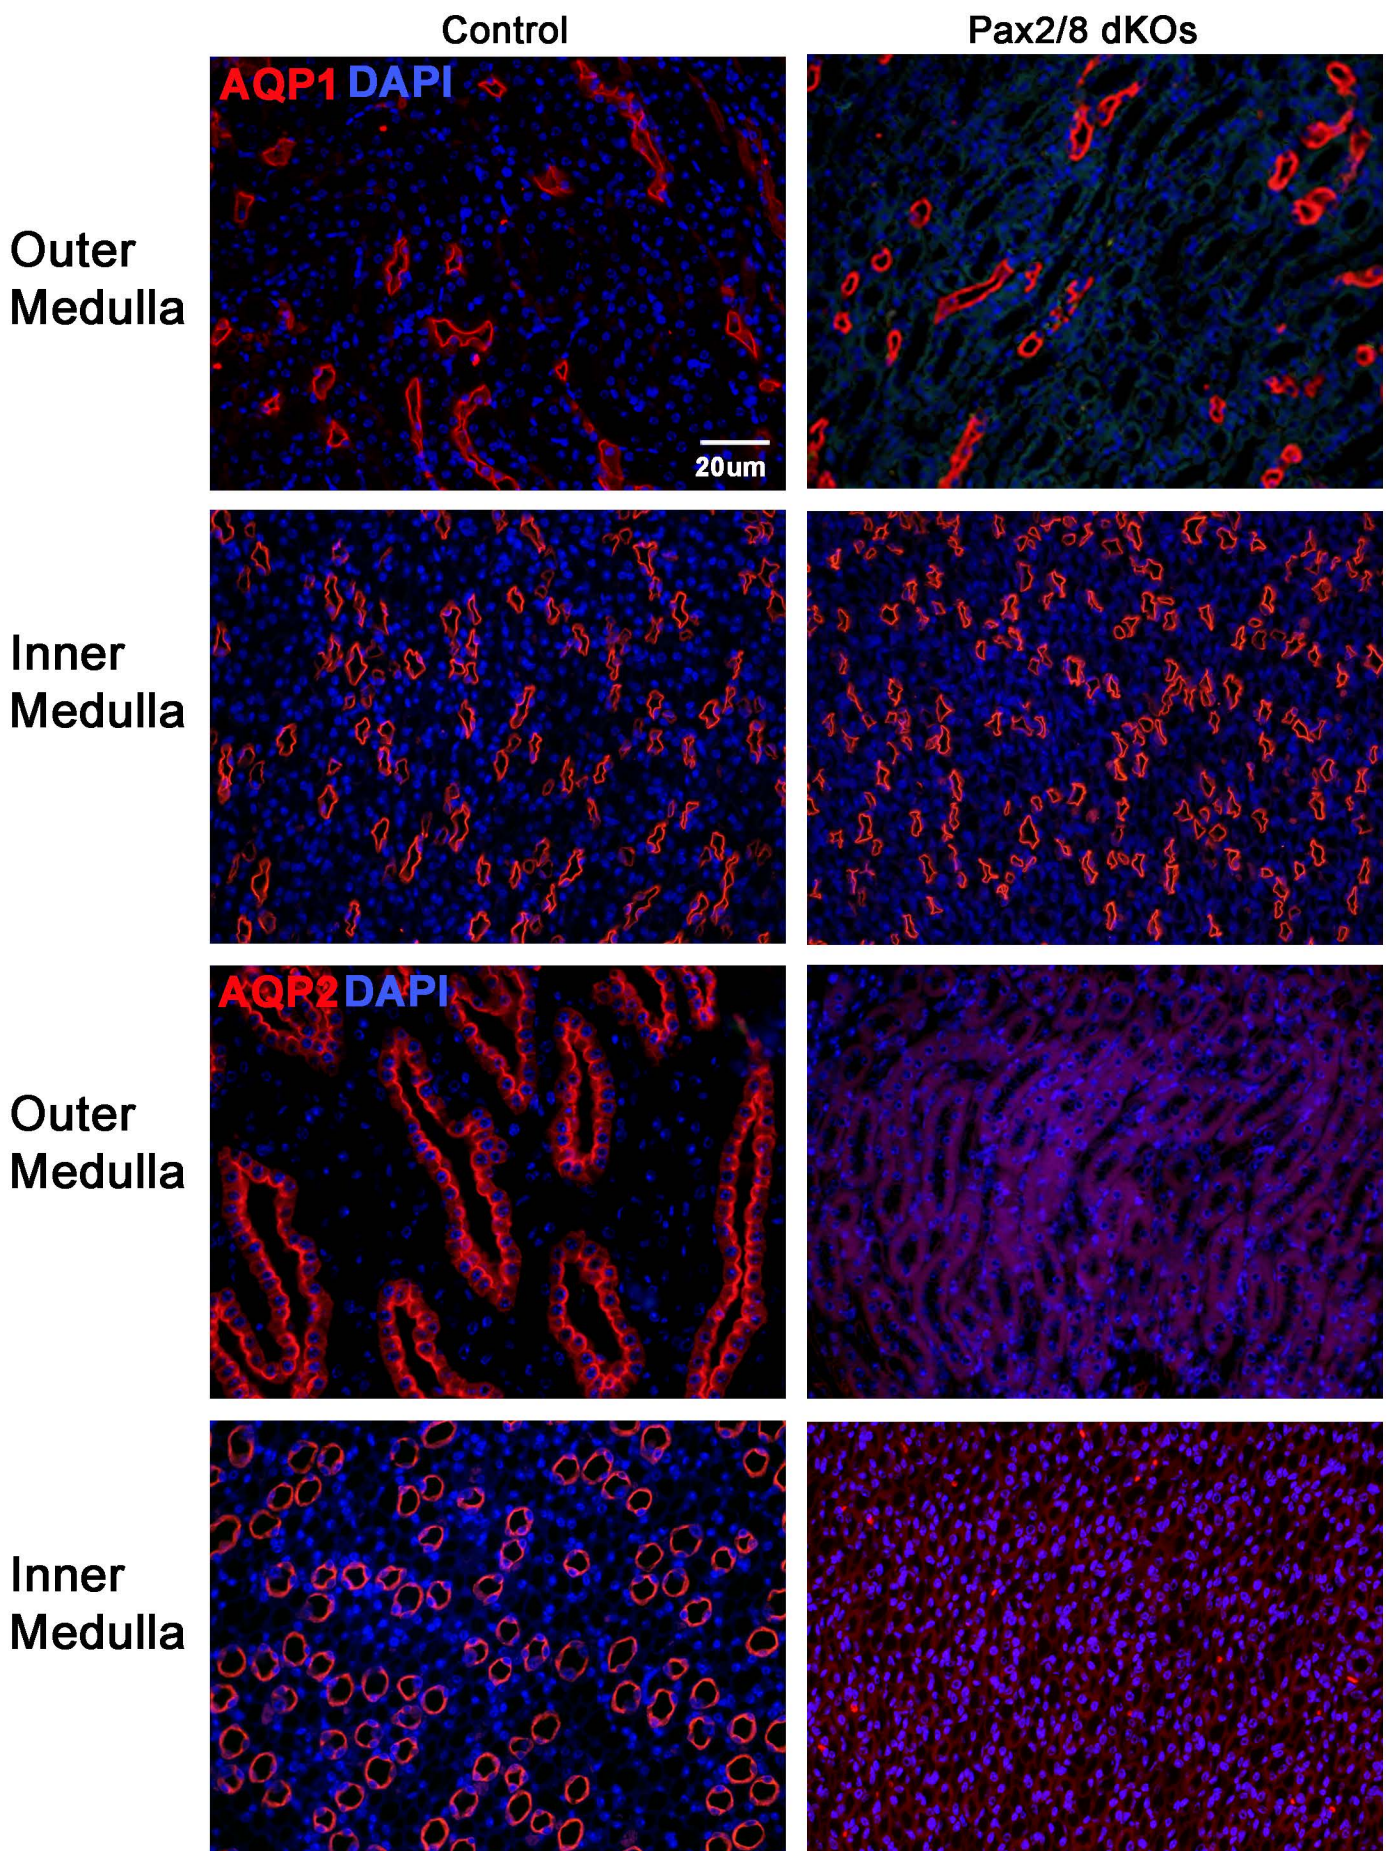

Supplemental Figure S3. Immunostaining of control and Pax2/8 dKO kidney sections stained with antibodies against Aqp1 (red) or Aqp2 (red) as indicated. Kidneys are 2 weeks post tamoxifen and nuclei are stained with Dapi (blue).

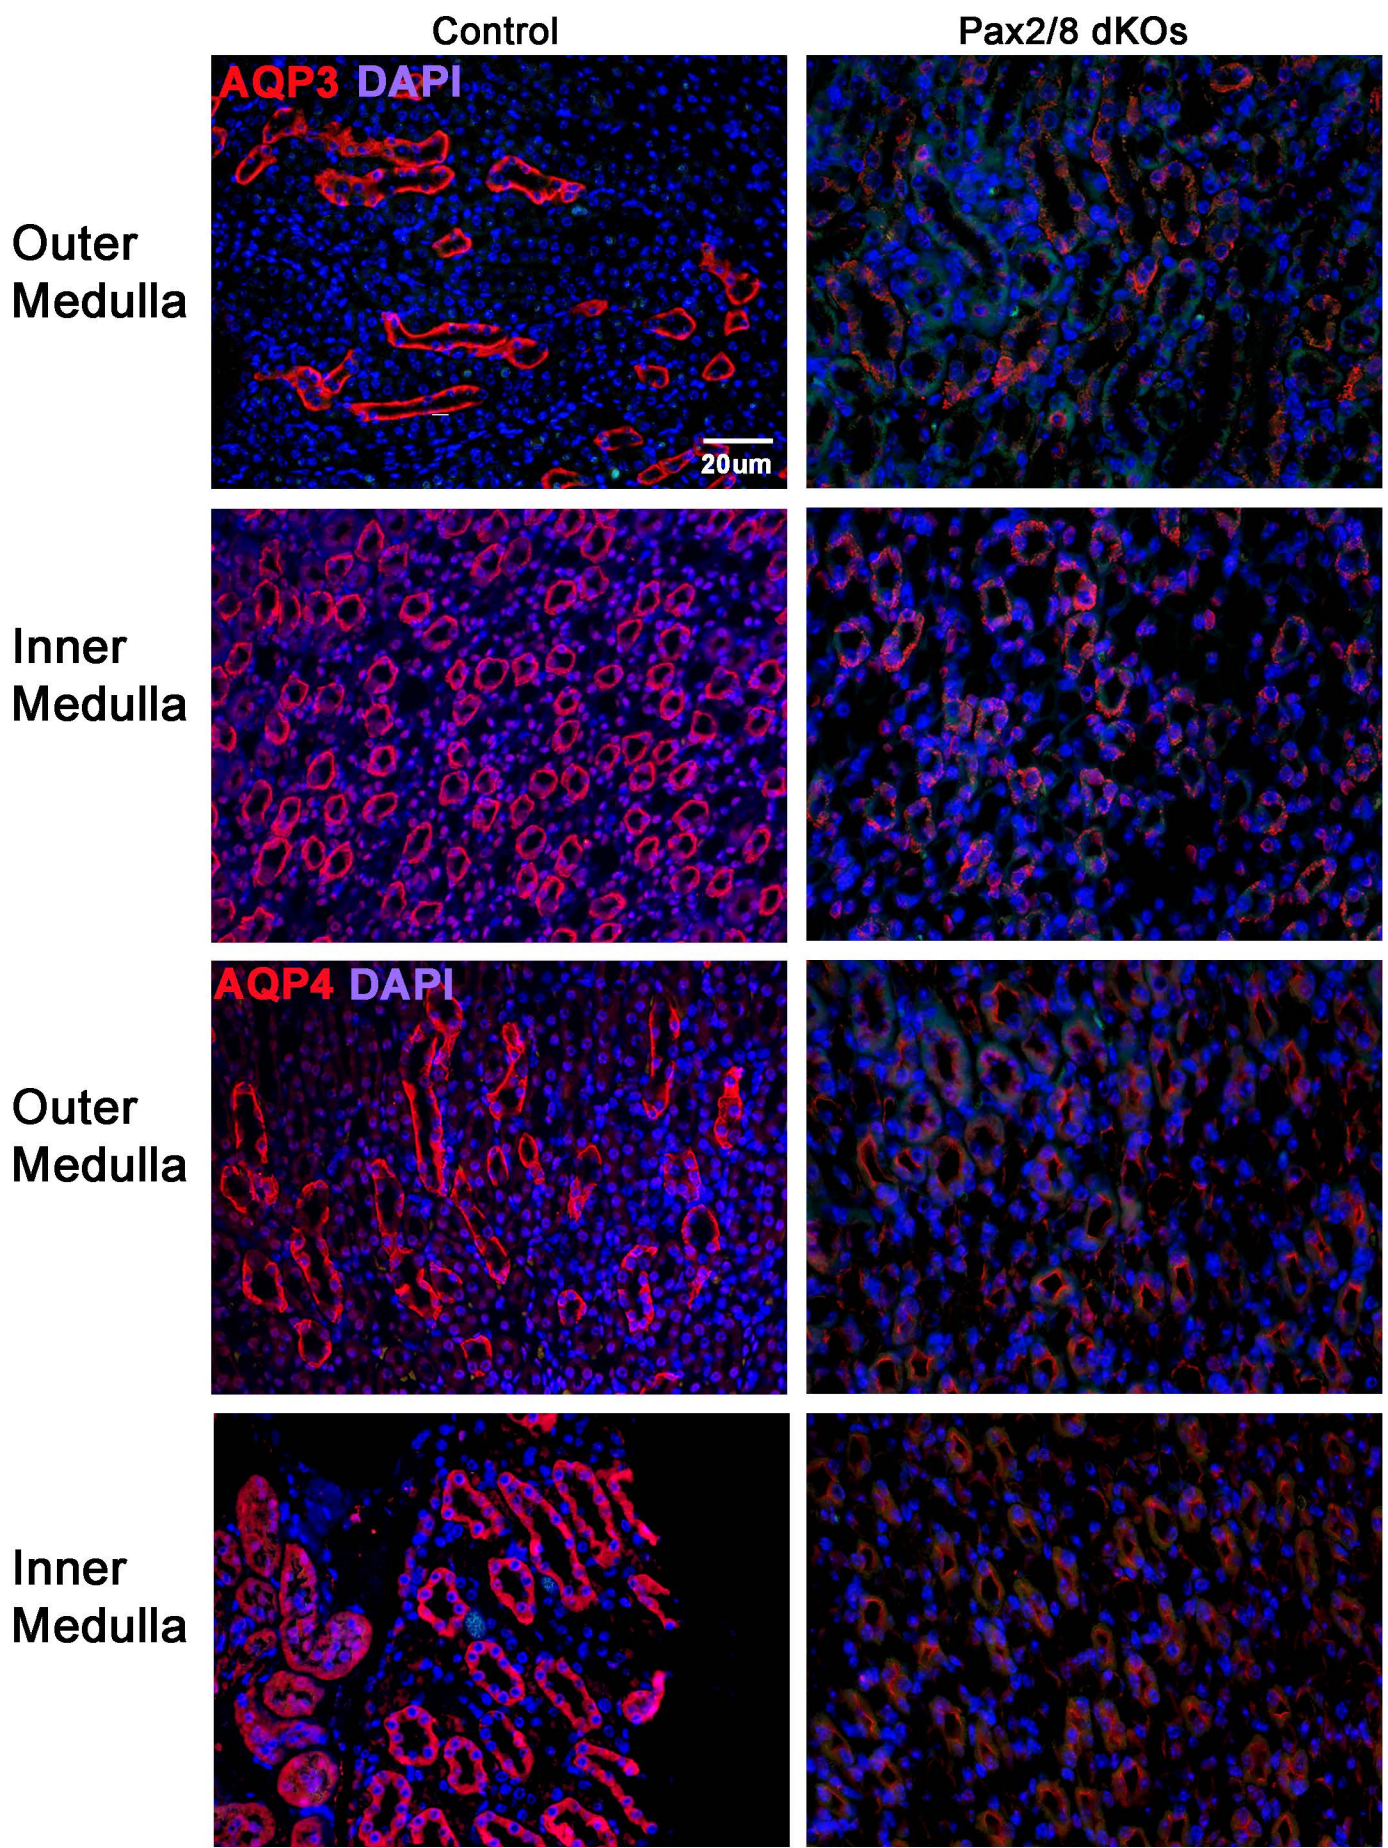

Supplemental Figure S4. Immunostaining of control and Pax2/8 dKO kidney sections stained with antibodies against Aqp3 (red) or Aqp4 (red) as indicated. Kidneys are 2 weeks post tamoxifen and nuclei are stained with Dapi (blue).

**A**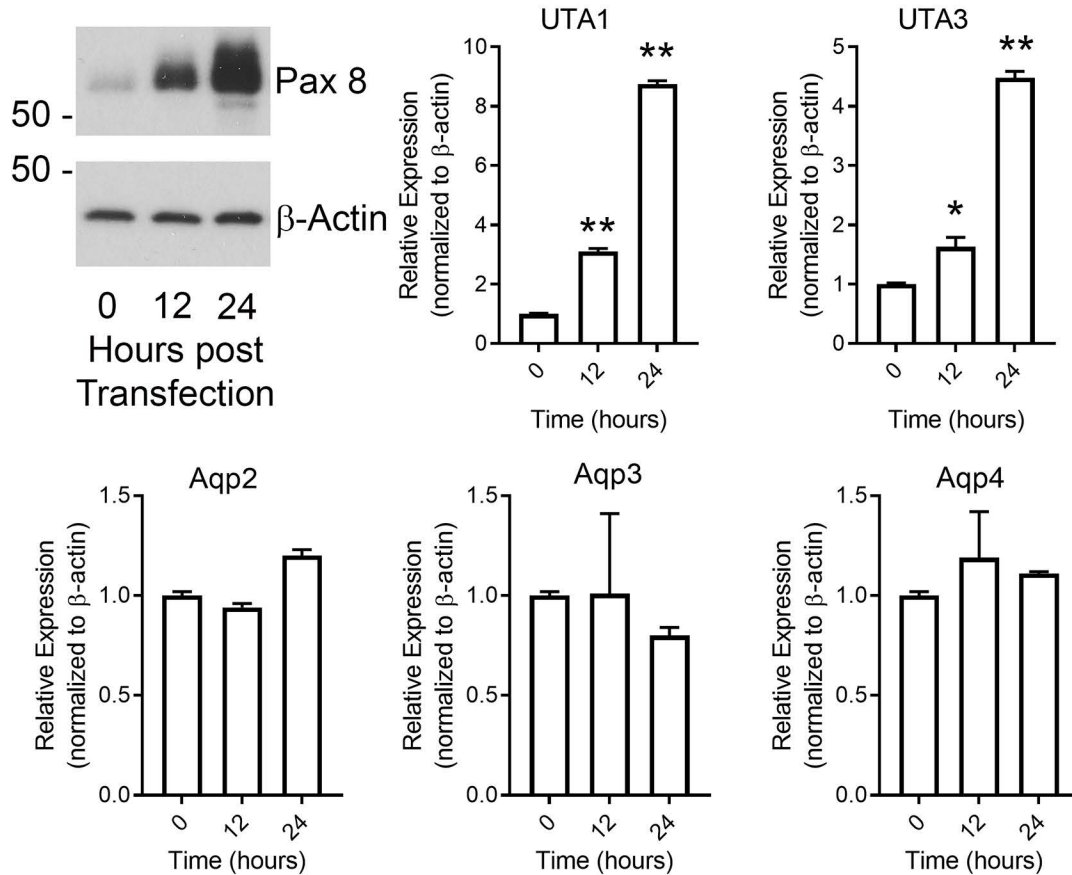**B**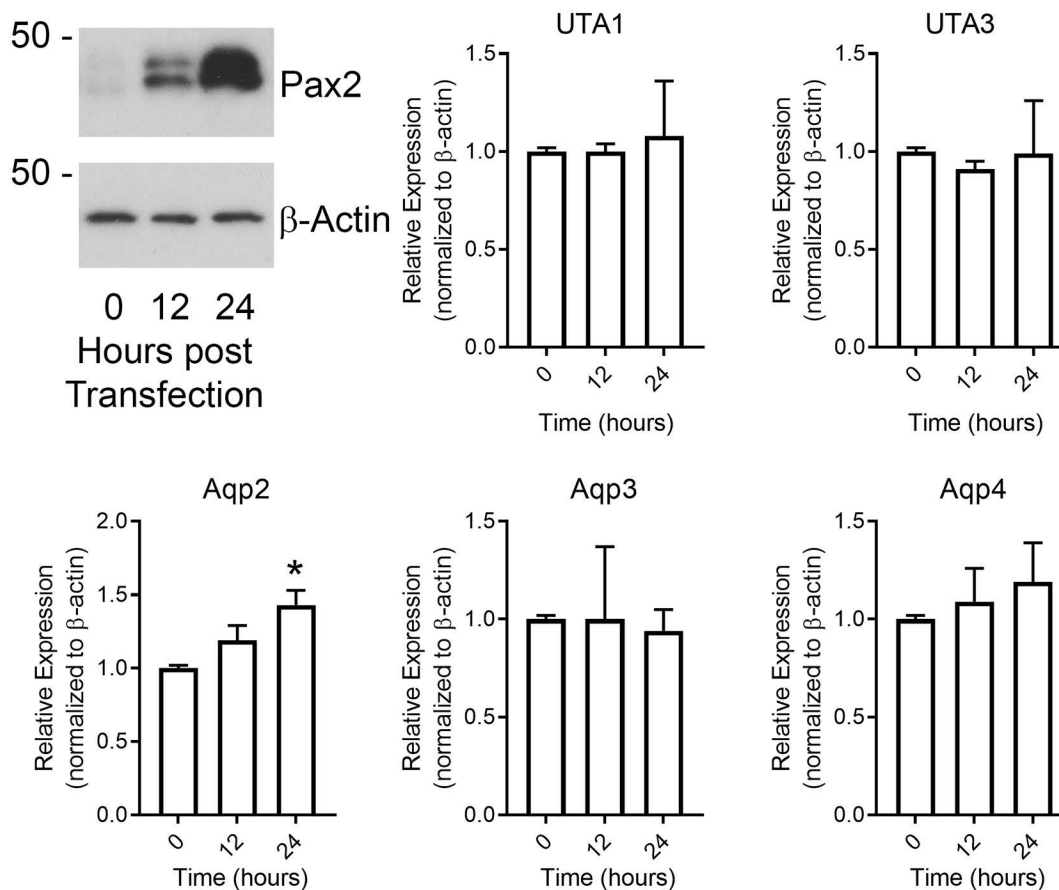

**Supplemental Figure S5. A) Transfection of Pax8 into mIMCD cells and qRT-PCR analyses for the indicated transcripts are shown before (0) or 12 or 24 hours post transfection. B) Similar experiments as in A but using Pax2 expression vectors. All transfections and qRT-PCRs were done in triplicate (\*\*p < .01, \*p < .05).**
