# Supplementary material
Source: PubMed Central journal article supplement (PMC7269349)
Supplement: ASN.2019090962SupplementaryData3.pdf [file ASN.2019090962SupplementaryData3.pdf]

**Table S2. Relative expression levels of Arginine Vasopressin and its receptors**

---

| <u>ProbeID</u> | <u>Symbol</u> | <u>UniGene</u> | <u>dKO1</u> | <u>dKO2</u> | <u>dKO3</u> | <u>Con.1</u> | <u>Con.2</u> | <u>Con.3</u> |
|----------------|---------------|----------------|-------------|-------------|-------------|--------------|--------------|--------------|
| 17217030       | Avpr1b        | Mm.89986       | 2.69        | 2.80        | 2.70        | 2.78         | 2.88         | 2.71         |
| 17237762       | Avpr1a        | Mm.4351        | 6.82        | 6.91        | 7.07        | 6.26         | 6.89         | 6.94         |
| 17364813       | Avpi1         | Mm.30060       | 5.24        | 5.14        | 5.56        | 5.01         | 5.38         | 5.73         |
| 17391665       | Avp           | Mm.6190        | 4.10        | 3.78        | 3.62        | 4.06         | 3.91         | 4.05         |
| 17535712       | Avpr2         | Mm.383171      | 5.57        | 5.68        | 5.37        | 6.45         | 6.72         | 6.76         |

---
