# Supplementary material
Source: PubMed Central journal article supplement (PMC7269349)
Supplement: ASN.2019090962SupplementaryData4.pdf [file ASN.2019090962SupplementaryData4.pdf]

**Table S3. PCR Primer Pairs**

---

ChIP Primers along 5' end of the SLC14A2 Genomic Sequence (primer 3, annealing temp 60 C)

Primer Set 1: 5'- GGTAACAGAGAAGGCAGCAA -3' and 5'- CCTTCTCCTCCCTCCCTCT -3'  
Primer Set 2: 5'- TTCACCCATGCCTTGACTGT -3' and 5'- TGGTCCCTGCCTCACTAAAG -3'  
Primer Set 3: 5'- CAGGTCATGATCCCCTCAA -3' and 5'- AGCCTTCCCTCATTGCTCT -3'  
Primer Set 4: 5'- CAGCAAAGCACATTCCTGGA -3' and 5'- CCCTTCTCAGAGTGGCACA -3'  
Primer Set 5: 5'- GCTGGATTCTGTTTGCGTTT -3' and 5'- CAGAGGATCTTGAGGCCAAT -3'  
Primer Set 6: 5'- TTGTCCCTCCAGGTTAGGTG -3' and 5'- AGAGGCTCTGGCAAGAGAGG -3'  
Primer Set 7: 5'- AGGCCAAGGTGGTGAAGAGAC -3' and 5'- CCTAGGTTTCATGGGTTGGAA -3'  
Primer Set 8: 5'- TGCCAGGGCATAAAAAATAAA -3' and 5'- GCAAGGCAAGGAAACAGAAG -3'  
Primer Set 9: 5'- TGCCTATCTTTTGAGCTACCG -3' and 5'- CATGGCTGACTCGCTAAATG -3'  
Primer Set 10: 5'- GAAGCCACCGTTGATCTTGT -3' and 5'- GCAATTGTAGTCCCTAGGTAAGC -3'  
Primer Set 11: 5'- TCCCCAAATGTCCTATCAA -3' and 5'- CGGAGATCCTTCATGGAAAA -3'

qRT-PCR Primers (annealing temp 60 C)

AQP1 5'-CTCCCTAGTCGACAATTCAC and 5'-ACAGTACCAGCTGCAGAGTG  
AQP2 5'-CTGGCTGTCAATGCTCTCCAC and 5'-TTGTCAGTGCGGCGCTCATC  
AQP3 5'-TTGGTGGCTGGCCAAGTGTC and 5'-GTCTGTGCCAGTGCATAGAT  
AQP4 5'-GAGTCACCACGGTTCATGGA and 5'-CGTTTGAATCACAGCTGGC  
UT-A1 5'-GACAGTGAGACGCAGTGAAG and 5'-ACGGTCTCAGAGCTCTCTTC  
UT-A2 5'-TTTCTCCAGTCCTATCTGAG and 5'-ACGGTCTCAGAGCTCTCTTC  
UT-A3 5'-ACGGTCTCAGAGCTCTCTTC and 5'-AGAGTGGAGGCCACACGGAT  
UTA4 5'-GCCCTTCAACATTGCCTTAACA and 5'-ATGTTGGGTGGAGTGGTTGT  
UT-B 5'-TCTTCTCAAACAAGGGCGAC and 5'-TTGCTGAGCACGGAGCTCAA'  
Pax2 5'-CATCTGCGATAATGACACAGTTCC, and 5'-CTGCTGAACTTTGGTCCGGATG  
Pax8 5'-GCCATGGCTGTGTAAGCAAG AND 5'-GTTCTGCCGCTTGTAAGTCTCC  
Gapdh 5'-GTAGACAAAATGGTGAAGGTCGGTG and 5'-GAGTCATACTGGAACATGTAGACCA  
β-actin 5'-TGTATGCCTCTGGTCGTACC and 5'-CAGGTCCAGACGCAGGATG

---

These primer sets were described by:

Klein JD, Sands JM, Qian L, Wang X, Yang B. Upregulation of urea transporter UT-A2 and water channels AQP2 and AQP3 in mice lacking urea transporter UT-B. J Am Soc Nephrol. 2004 May;15(5):1161-7.
